# Supplementary material for: PanCD44 Immunohistochemical Evaluation in Prostatectomies from Patients with Adenocarcinoma
Source: Hindawi journal article supplement (doi:10.1155/2018/2061268), 2018-01-01
Supplement: f1 [file 2061268.f1.pdf]

## Supplement

**Table S1:** Immunohistochemical evaluations of CD44 expression in prostatectomies.

| Author                        | N   | Clone               | Plot                                                                                                                                 | Cut-off                                                                              | Malignant  |
|-------------------------------|-----|---------------------|--------------------------------------------------------------------------------------------------------------------------------------|--------------------------------------------------------------------------------------|------------|
| Nagabhushan et al., 1996 (43) | 50  | GKW.A3              | 0, 1, 2 and 3                                                                                                                        | > 1                                                                                  | 60%        |
| Noordzij et al., 1997 (11)    | 97  | SFF2                | <10%, 10-25%, 25-50% and >50%                                                                                                        |                                                                                      | 86%        |
| Kallakury et al., 1998 (47)   | 106 |                     | Intensity: weak, moderate, intense.<br>Extension: focal <10%, regional 11-50%, diffuse>50%                                           | Weak and diffuse;<br>moderate and regional or diffuse;<br>Intense and any extension. | 53%        |
| Marzo et al., 1998 (10)       | 94  | 2C5<br>H4C4<br>U9M2 | 0 = 0-5%<br>1 = 6-25%<br>2 = 26-50%<br>3 = 51-75%<br>4 = >75%<br>0 = absent<br>1 = weak<br>2 = moderate<br>3 = strong<br>4 = intense | >6+                                                                                  | 80%        |
| Paradis et al., 1998 (22)     | 38  |                     | Focal <20%<br>Diffuse >20%                                                                                                           | >20%                                                                                 | 37%        |
| Brewster et al., 1999 (29)    | 76  | DF1485              | Negative 0%<br>Focal ≤ 10%<br>Regional 11-50%<br>Diffuse >50%                                                                        | >10%                                                                                 | 36%        |
| Aaltomaa et al., 2002 (46)    | 77  | 2C5                 | Continuous                                                                                                                           | >25%                                                                                 | 66%        |
| Lazari et al., 2013 (48)      | 135 | DF1485              | 1+ = <10%<br>2+ = 10-50%<br>3+ = >50%                                                                                                |                                                                                      | 3+ = 37.8% |
| Tei et al., 2014 (35)         | 160 |                     | Extension:<br>0 = 0-5%<br>1 = 6-25%<br>2 = 26-75%<br>3 = 75-100%<br>Intensity:<br>1 = weak<br>2 = intermediate<br>3 = strong         | >3                                                                                   | 28.2%      |

Empty cells indicate unavailable data.

**Table S2:** Studies on biochemical recurrence of prostate cancer evaluating CD44 expression in radical prostatectomy.

| <b>Author</b>               | <b>N</b> | <b>T</b> | <b>C.O.</b> | <b>BR</b> | <b>2x2</b>         | <b>LR</b> | <b>Cox (HR-IC-p)</b>                      |
|-----------------------------|----------|----------|-------------|-----------|--------------------|-----------|-------------------------------------------|
| Noordzij et al., 1997 (11)  | 29       | 81       | 1.0         | 41%       | 0.002              |           | 0.381<br>(0.179-0.974)<br><i>p</i> =0.012 |
| Kallakury et al., 1998 (47) | 99       | 39.9     | 0.4         | 26%       | 0.02               |           | NS                                        |
| Paradis et al., 1998 (22)   | 38       | 17.1     |             | 26%       |                    | NS        |                                           |
| Brewster et al., 1999 (29)  | 76       | 38       | 0.2         | 30%       | 0.002 <sup>a</sup> | 0.0465    | NS                                        |
| Aaltomaa et al., 2002 (46)  | 77       | 49.2     | 0.2         | 30%       | NS                 |           | NS                                        |
| Tei et al., 2014 (35)       | 160      | 51       | 0.2         | 25%       |                    |           | HR - 2.09<br><i>p</i> =0.056 <sup>b</sup> |

N=number of patients submitted to prostatectomy and follow-up; T=mean or median duration of follow-up (months); C.O.=cut-off for biochemical recurrence (PSA in ng/mL); BR=percentage of patients with biochemical recurrence; 2x2=level of significance (*p*-value) in univariate analysis with a 2x2 table using the chi-squared test or Fisher's exact test; LR=Log Rank statistical significance (*p*-value); Cox (HR-IC-p) = Cox regression with Hazard Ratio at the 95% confidence interval and *p*-value; NS=statistically nonsignificant; <sup>a</sup>=data extracted from the text and recalculated; <sup>b</sup>=univariate Cox regression. Empty cells represent values not available or not calculated.
